# Supplementary material for: Preparation of Antarctic Krill Oil Emulsion and Its Stability under Catalase Treatment
Source: MDPI journal article supplement (doi:10.3390/foods10112797), 2021-11-13
Supplement: s1 [file s1]

Table S1 Fatty acids composition analysis of Antarctic krill oil (&gt;1 %)

| Name            | Content                    |
|-----------------|----------------------------|
| C14:0           | 6.12±0.81 %                |
| C16:0           | 21.01±1.34 %               |
| C16:1(cis,n-7)  | 6.74±0.25 %                |
| C17:1(cis,n-10) | 1.10±0.05 %                |
| C18:0           | 1.53±0.08 %                |
| C18:1(cis,n-9)  | 11.31±0.65 %               |
| C18:2(cis,n-6)  | 2.05±0.09 %                |
| C18:3(cis,n-3)  | 2.97±0.06 %                |
| C20:5(EPA)      | 22.78±0.55 %               |
| C22:6(DHA)      | 13.71±0.26 %               |
| ΣSFA            | 28.66 % (estimated values) |
| ΣMUFA           | 19.15 % (estimated values) |
| ΣPUFA           | 41.51 % (estimated values) |
| EPA+DHA         | 36.49 % (estimated values) |

Table S2 The main functional ingredients of Antarctic krill oil

| Name         | Content           |
|--------------|-------------------|
| Phospholipid | 52.97±2.50 g/100g |
| Astaxanthin  | 8.21±0.81 mg/kg   |
| Totaxin      | 4.25±0.50 mg/100g |
| Vitamin A    | 2.17±0.02 mg/100g |
| Cholesterol  | 7.19±0.55 mg/g    |

Table S3 Effects of different emulsifiers on the properties of the emulsion

|          | Turbidity   | Stability (%) | particle size (nm) | ζ-potential (mV) |
|----------|-------------|---------------|--------------------|------------------|
| Tween-80 | 0.56 ± 0.02 | 75.16 ± 7.00  | 145.10 ± 10.10     | -40.60 ± 3.00    |
| Lecithin | 0.45 ± 0.05 | 42.37 ± 4.00  | 378.60 ± 15.30     | -68.20 ± 6.00    |
| Span-20  | 0.64 ± 0.03 | 69.19 ± 6.00  | 184.20 ± 13.00     | -35.10 ± 4.00    |

Table S4 Effects of different oil concentrations on the properties of the emulsion

|       | Turbidity   | Stability (%) | particle size (nm) | ζ-potential (mV) |
|-------|-------------|---------------|--------------------|------------------|
| 0.25% | 0.16 ± 0.01 | 56.75 ± 5.00  | 1865.10 ± 75.30    | -10.20 ± 0.50    |
| 0.50% | 0.31 ± 0.03 | 63.21 ± 6.00  | 792.40 ± 20.30     | -20.60 ± 0.90    |
| 1.00% | 0.76 ± 0.05 | 76.92 ± 6.00  | 184.20 ± 13.00     | -26.10 ± 1.20    |
| 2.50% | 1.07 ± 0.09 | 60.19 ± 6.00  | 1025.30 ± 30.60    | -28.30 ± 0.90    |
| 5.00% | 2.13 ± 0.10 | 41.76 ± 4.00  | 2008.60 ± 75.60    | -30.20 ± 2.10    |

Table S5 Effects of different ratio of emulsifier to oil on the properties of the emulsion

|      | Turbidity   | Stability (%) | particle size (nm) | ζ-potential (mV) |
|------|-------------|---------------|--------------------|------------------|
| 1:10 | 0.83 ± 0.05 | 36.79 ± 5.00  | 253.20 ± 9.60      | -16.40 ± 1.20    |

|      |                 |                  |                     |                   |
|------|-----------------|------------------|---------------------|-------------------|
| 1:5  | $0.59 \pm 0.03$ | $70.56 \pm 6.00$ | $210.30 \pm 3.50$   | $-33.50 \pm 1.50$ |
| 1:1  | $0.75 \pm 0.05$ | $68.34 \pm 5.00$ | $146.50 \pm 4.00$   | $-30.50 \pm 0.80$ |
| 5:1  | $0.83 \pm 0.03$ | $50.12 \pm 5.00$ | $798.40 \pm 15.60$  | $-25.30 \pm 0.60$ |
| 10:1 | $1.05 \pm 0.04$ | $32.18 \pm 3.00$ | $1532.80 \pm 23.10$ | $-22.60 \pm 0.90$ |
